# Supplementary material for: Urine Annexin A1 as an Index for Glomerular Injury in Patients
Source: Hindawi journal article supplement (doi:10.1155/2014/854163), 2014-01-01
Supplement: f1 [file 854163.f1.pdf]

**Supplementary Table 1. Characteristics of 47 diabetic patients without albuminuria (normoalbuminuria) or with early kidney involvement (microalbuminuria and macroalbuminuria).**

|                                   | <b>Normoalbuminuria</b> | <b>Microalbuminuria</b> | <b>Macroalbuminuria</b> |
|-----------------------------------|-------------------------|-------------------------|-------------------------|
| <b>Age (year)</b>                 | 58 (43-72)              | 71 (51-81)              | 65.5 (49-75)            |
| <b>BMI (kg/m<sup>2</sup>)</b>     | 38.7 (32.5-49.1)        | 41.4 (37.5-51.9)        | 42.4 (37.2-46.3)        |
| <b>SBP (mmHg)</b>                 | 130 (120-150)           | 140 (118-160)           | 144 (120-170)           |
| <b>DBP (mmHg)</b>                 | 80 (70-92)              | 82 (70-92)              | 85 (70-100)             |
| <b>HbA1c (%)</b>                  | 7.1 (5.6-11.6)          | 7.5 (5.5-10.4)          | 8.45 (7.2-11.4)         |
| <b>Total cholesterol (mmol/L)</b> | 206.5 (144-300)         | 179 (142-284)           | 164.5 (149-213)         |
| <b>Triglyceride (mmol/L)</b>      | 116 (61-508)            | 140.5 (71-494)          | 152.5 (82-270)          |
| <b>GPT (U/L)</b>                  | 31 (12-62)              | 20 (11-62)              | 20.5 (12-92)            |
| <b>Serum creatinine (mg/dL)</b>   | 0.8 (0.6-1.2)           | 0.9 (0.6-1.3)           | 0.75 (0.7-1.1)          |
| <b>UACR</b>                       | 12.60 (3.4-19.97)       | 60.33 (24.01-291.67)    | 436.70 (312.82-1459.77) |

Data are median (interquartile range).
